# Supplementary material
Source: publisher figshare collection journal article supplement (https://asha.figshare.com/ndownloader/files/31694666)
Supplement: Supplementary file 1 [file 31694666]

## **Supplemental Material S1. Questionnaire administered to students.**

### **Instructions**

I'm going to ask you some questions about the types of noises that you're around. I'll read each question out loud, and you can follow along on this copy. If you don't understand a question or the answer choices, please ask me, and I'll be happy to explain. When you tell me your answer, I'll write it down on my copy. On some questions, you can choose more than one answer. For example, you may hunt and target shoot, or you may be exposed to noise from saws, lawnmowers, and welding equipment. I'll let you know when we get to any questions where you can choose more than one answer, but if you're ever unsure, please ask me.

The most important thing to remember is that there are no right or wrong answers to these questions. All you need to do is be completely honest when you answer each question. As long as you answer honestly, the results of this study will be accurate and true, which is our main goal. Do you have any questions before we start?

#### **1. Have you been exposed to any loud noise in the last 24 hours?**

- ☐ Yes
- ☐ No

**If yes, did you wear hearing protection (e.g., earplugs or earmuffs)?**

- ☐ Yes
- ☐ No

#### **2. Do you ever notice a ringing sound in one or both of your ears after you've been around loud noise?**

- ☐ Yes
- ☐ No

#### **3. How often do you use guns or are you around people who are shooting guns?**

- ☐ Very frequently (12 or more times per year)
- ☐ Frequently (7-11 times per year)
- ☐ Occasionally (3-6 times per year)
- ☐ Rarely (1-2 times per year)
- ☐ Never

#### **4. What type(s) of gunfire are you exposed to?**

- ☐ Shotgun
- ☐ Rifle
- ☐ Pistol
- ☐ Other(s): \_\_\_\_\_
- ☐ Not applicable - I am never exposed to gunfire.

**5. What activities do you do that involve guns?**

- ☐ Hunting
- ☐ Target shooting
- ☐ Skeet shooting
- ☐ Other(s): \_\_\_\_\_
- ☐ Not applicable - I am never exposed to gunfire.

**6. How often do you wear hearing protection (e.g., earplugs, earmuffs) when you're exposed to gunfire?**

- ☐ Always
- ☐ Most of the time
- ☐ Sometimes
- ☐ Never
- ☐ Not applicable - I am never exposed to gunfire.

**7. What type of hearing protection do you wear when you're exposed to gunfire?**

- ☐ Foam earplugs
- ☐ Pre-molded rubber earplugs (with flanges)
- ☐ Custom earplugs
- ☐ Protective earmuffs
- ☐ Other(s): \_\_\_\_\_
- ☐ I never wear any type of hearing protection.
- ☐ Not applicable - I am never exposed to gunfire.

**8. How often do you use or work near people who are using heavy machinery, such as tractors, bulldozers, backhoes, drilling equipment, etc.?**

- ☐ Very frequently (12 or more times per year)
- ☐ Frequently (7-11 times per year)
- ☐ Occasionally (3-6 times per year)
- ☐ Rarely (1-2 times per year)
- ☐ Never

**9. What type(s) of heavy machinery are you exposed to?**

- ☐ Tractors and other farm equipment
- ☐ Bulldozers and other construction equipment
- ☐ Oil drilling equipment
- ☐ Other(s): \_\_\_\_\_
- ☐ Not applicable - I am never exposed to heavy machinery.

**10. How often do you wear hearing protection (e.g., earplugs, earmuffs) when you're exposed to heavy machinery?**

- ☐ Always
- ☐ Most of the time
- ☐ Sometimes
- ☐ Never
- ☐ Not applicable - I am never exposed to heavy machinery.

**11. What type of hearing protection do you wear when you're exposed to heavy machinery?**

- ☐ Foam earplugs
- ☐ Pre-molded rubber earplugs (with flanges)
- ☐ Custom earplugs
- ☐ Protective earmuffs
- ☐ Other(s): \_\_\_\_\_
- ☐ I never wear any type of hearing protection.
- ☐ Not applicable - I am never exposed to heavy machinery.

**12. How often do you use or work near people who are using power tools, such as saws, drills, welders, lawnmowers, etc.?**

- ☐ Very frequently (12 or more times per year)
- ☐ Frequently (7-11 times per year)
- ☐ Occasionally (3-6 times per year)
- ☐ Rarely (1-2 times per year)
- ☐ Never

**13. What type(s) of power tools are you exposed to?**

- ☐ Saws, drills, sanders, and other carpentry tools
- ☐ Lawnmowers and weed eaters
- ☐ Welding equipment
- ☐ Other(s): \_\_\_\_\_
- ☐ Not applicable - I am never exposed to power tools.

**14. Do you ever use power tools at school, such as during a shop class or an agriculture class?**

- ☐ Yes
- ☐ No

**If yes, do you use hearing protection when using power tools at school?**

- ☐ Yes
- ☐ No

**15. How often do you wear hearing protection (e.g., earplugs, earmuffs) when you're exposed to power tools?**

- ☐ Always
- ☐ Most of the time
- ☐ Sometimes
- ☐ Never
- ☐ Not applicable - I am never exposed to power tools.

**16. What type of hearing protection do you wear when you're exposed to power tools?**

- ☐ Foam earplugs
- ☐ Pre-molded rubber earplugs (with flanges)

- ☐ Custom earplugs
- ☐ Protective earmuffs
- ☐ Other(s): \_\_\_\_\_
- ☐ I never wear any type of hearing protection.
- ☐ Not applicable - I am never exposed to power tools.

**17. How often do you use all-terrain vehicles (ATVs), such as 4-wheelers, motorcycles, dirt bikes, go-carts, etc.?**

- ☐ Very frequently (12 or more times per year)
- ☐ Frequently (7-11 times per year)
- ☐ Occasionally (3-6 times per year)
- ☐ Rarely (1-2 times per year)
- ☐ Never

**18. What type(s) of all-terrain vehicles (ATVs) do you use?**

- ☐ 3-wheelers or 4-wheelers
- ☐ Motorcycles
- ☐ Dirt bikes
- ☐ Go-carts
- ☐ Other(s): \_\_\_\_\_
- ☐ Not applicable - I am never exposed to all-terrain vehicles.

**19. How often do you wear hearing protection (e.g., earplugs, earmuffs) when you use all-terrain vehicles (ATVs)?**

- ☐ Always
- ☐ Most of the time
- ☐ Sometimes
- ☐ Never
- ☐ Not applicable - I am never exposed to all-terrain vehicles.

**20. What type of hearing protection do you wear when you're using all-terrain vehicles (ATVs)?**

- ☐ Foam earplugs
- ☐ Pre-molded rubber earplugs (with flanges)
- ☐ Custom earplugs
- ☐ Protective earmuffs
- ☐ Other(s): \_\_\_\_\_
- ☐ I never wear any type of hearing protection.
- ☐ Not applicable - I am never exposed to all-terrain vehicles.

**21. How often do you listen to loud music?**

- ☐ Very frequently (12 or more times per year)
- ☐ Frequently (7-11 times per year)
- ☐ Occasionally (3-6 times per year)
- ☐ Rarely (1-2 times per year)
- ☐ Never

**22. Where/how do you listen to loud music?**

- ☐ At concerts
- ☐ When I play in the school marching band
- ☐ When I play in the school orchestra
- ☐ When I play in a band outside of school
- ☐ When I listen to my iPod, MP3 player, or other personal listening device
- ☐ When I use heavy machinery (e.g., while riding a tractor)
- ☐ When I use power tools (e.g., while mowing the lawn)
- ☐ When I drive or ride in the car
- ☐ Other(s): \_\_\_\_\_
- ☐ Not applicable - I am never exposed to loud music.

**23. What equipment do you use to listen to loud music?**

- ☐ Loudspeakers
- ☐ In-ear headphones
- ☐ Regular over-ear headphones
- ☐ Beats over-ear or in-ear headphones
- ☐ Noise-cancelling headphones
- ☐ Other(s): \_\_\_\_\_
- ☐ Not applicable - I am never exposed to loud music.

**24. When you listen to music with earbuds, earphones, or headphones, do people around you ever ask you to turn down the volume because they can hear it too?**

- ☐ Yes, always
- ☐ Yes, most of the time
- ☐ Yes, sometimes
- ☐ No, never

**25. Are you exposed to any other types of noise that were not listed in the previous questions, such as fireworks, NASCAR races, drag races, or others?**

- ☐ Yes
- ☐ No

If yes, please list the other types of noise to which you are exposed:

\_\_\_\_\_

**26. How old do you have to be for noise to hurt your hearing?**

- ☐ At least 20 years of age
- ☐ At least 30 years of age
- ☐ At least 40 years of age
- ☐ At least 50 years of age
- ☐ Noise can hurt your hearing at any age.

**27. Where did you learn about the effects of noise on your hearing?**

- ☐ Teacher
- ☐ School nurse

- ☐ Medical doctor
- ☐ Audiologist
- ☐ Family member or friend
- ☐ Club (e.g., 4-H, Boy Scouts, Girl Scouts)
- ☐ Internet
- ☐ Television
- ☐ Other(s): \_\_\_\_\_
